# Supplementary material
Source: PubMed Central journal article supplement (PMC2761629)
Supplement: NIHMS143595-supplement-Supplemntary_Data.pdf [file NIHMS143595-supplement-Supplemntary_Data.pdf]

### Supplementary information

**Table 1.** Nucleotide sequence of oligonucleotide primers used in this study

Decorin-F: GTC TGG CCA ATG TTC CTC AT

Decorin-R: TGC GGA GAT GTT GTT GTT GT

Biglycan-F: GGT GGG CAT CAA TGA CTT CT

Biglycan-R: CAG TAG GGC ACA GGG TTG TT

Mimecan-F: GAA CCT GTG CAA AGC CAA GT

Mimecan-R: TCC CTT TCC TTG GGC TAA GT

Lumican-F: TGC AGT GGC TCA TTC TTG AC

Lumican-R: GGA CTC GGT CAG GTT GTT GT

Keratocan-F: CTG AGG CTC AAC CAC AAC AA

Keratocan-R: GTG CTG CAG GTT AGC ATT GA

Chst5-F: TCC AGC ACT GTC ATG CTT TC

Chst5-R: CGG CTC CAT CAG GTA GAA GA

Mmp2 (345/369) TCTCTGCGTCCTGTGCTGCCTGTTG

Mmp2 (575/550)C GTGTTCTGGTCAAGGTCACCTGTCTG

Mmp3 (324/350) CCAACACTATGGAGCTGATGCATAAGC

Mmp3 (546/519)C CCTTCAGAGATCCTGGAGAAAGTGAGTG

Mmp9 (260/282) GTGAGCTGGACAGCCAGACACTA

Mmp9 (507/484)C GACAATGTCCGCTTCGGGTCCGTA

Mmp13 (99/122) ATGACCTGTCTGAGGAAGACCTTG

Mmp13 (316/294)C CACATCAGGCACTCCACATCTTG

18S rRNA-F GATGGTAGTCGCCGTGCCTA

18S rRNA-R CAGGGCCTCGAAAGAGTCCTGTA
